# Supplementary material
Source: ML conference proceedings conference paper supplement (https://openreview.net/forum?id=AN4huNjF3r)
Supplement: supplementary_material [file 32b-mmmu-med.pdf › MedVLThinker-qualitative-results/32b/32b-mmmu-med.pdf]

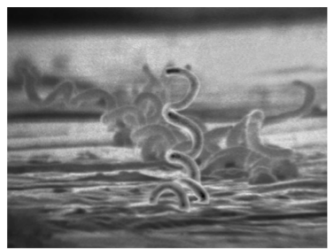

**Dataset:** MMMU-medical

**Question:** Based on its shape, which microbe is this?

**Options:** A. *Neisseria gonorrhoeae*; B. *Chlamydia trachomatis*; C. *Treponema pallidum*; D. *Haemophilis ducreyi*

---

<think> To determine which microbe is depicted in the image, let's analyze the shape and characteristics: 1. **Shape Analysis:** The image shows a long, thin, spiral-shaped structure. This shape is characteristic of spirochetes, which are bacteria with a distinctive corkscrew-like appearance. 2. **Microbe Identification:** *Neisseria gonorrhoeae*: This bacterium is typically spherical or kidney-shaped and does not have a spiral structure. *Chlamydia trachomatis*: This is an obligate intracellular parasite and is not visible under a light microscope in this form. It appears as small, round bodies. *Treponema pallidum*: This is a spirochete known for its spiral shape and is the causative agent of syphilis. *Haemophilis ducreyi*: This bacterium is rod-shaped and does not have a spiral structure. 3. **Conclusion:** The spiral shape in the image is consistent with the morphology of ***Treponema pallidum***. </think> <answer>C. *Treponema pallidum*</answer>
