# Supplementary material
Source: ML conference proceedings conference paper supplement (https://openreview.net/forum?id=AN4huNjF3r)
Supplement: supplementary_material [file 32b-pathvqa.pdf › MedVLThinker-qualitative-results/32b/32b-pathvqa.pdf]

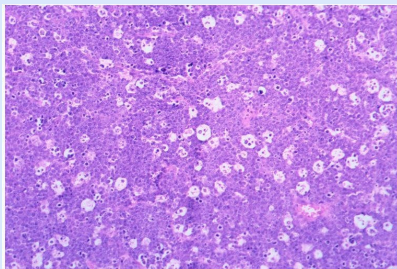

**Dataset:** PathVQA

**Question:** Does this image show burkits lymphoma?

**Options:** A. Intra-aortic balloon pump; B. Carotid artery dissection;  
C. Mitral insufficiency; D. Subclavian steal; E. Aortic insufficiency

---

<think> To determine whether the image shows Burkitt's lymphoma, let's analyze the key features: 1. **Histological Appearance:** Burkitt's lymphoma is characterized by a highly mitotic, starry-sky appearance. This is due to the presence of numerous mitotic figures and scattered macrophages (often referred to as "starry sky" because of the scattered appearance of these cells). 2. **Starry-Sky Pattern:** In Burkitt's lymphoma, the lymphoma cells are small to medium-sized, with a high nuclear-to-cytoplasmic ratio, and are often arranged in a diffuse pattern. The presence of tingible body macrophages, which are macrophages that engulf apoptotic bodies, is a hallmark feature that gives the "starry-sky" appearance. 3. **Image Analysis:** The provided image shows a diffuse population of cells with a high mitotic rate. There are scattered cells with a more prominent appearance, which could be tingible body macrophages. The overall pattern is consistent with the "starry-sky" appearance typical of Burkitt's lymphoma. 4. **Conclusion:** Based on the histological features observed in the image, it is consistent with the appearance of Burkitt's lymphoma. </think> <answer>A. Yes</answer>
