# Supplementary material
Source: ML conference proceedings conference paper supplement (https://openreview.net/forum?id=AN4huNjF3r)
Supplement: supplementary_material [file 32b-pmc-vqa.pdf › MedVLThinker-qualitative-results/32b/32b-pmc-vqa.pdf]

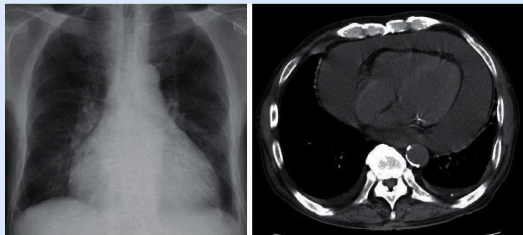

**Dataset:** PMC VQA

**Question:** What did the imaging reveal about the patient's pericardial fluid?

**Options:** A. Very little; B. A moderate amount; C. A massive amount; D. None

---

<think> To determine the amount of pericardial fluid in the patient, let's analyze the provided images: 1. **Chest X-ray (Left Image):** The chest X-ray shows a widened mediastinum, which can be indicative of pericardial effusion. However, the X-ray alone is not definitive for quantifying the amount of fluid. 2. **CT Scan (Right Image):** The CT scan provides a more detailed view of the pericardial space. The image shows a significant amount of fluid surrounding the heart, which is consistent with a pericardial effusion. The fluid appears to be extensive, filling the pericardial space and compressing the heart, which is characteristic of a massive pericardial effusion. Given the visual evidence from both the chest X-ray and the CT scan, the pericardial fluid appears to be extensive and significant. </think> <answer>C. A massive amount</answer>
