# Supplementary material
Source: ML conference proceedings conference paper supplement (https://openreview.net/forum?id=AN4huNjF3r)
Supplement: supplementary_material [file 32b-slake.pdf › MedVLThinker-qualitative-results/32b/32b-slake.pdf]

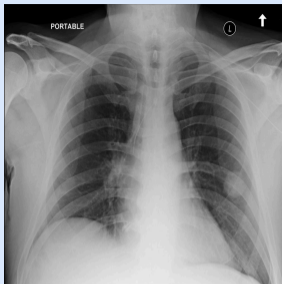

**Dataset:** SLAKE

**Question:** Which side of lung is abnormal in this image, left or right?

**Options:** A. left; B. right

---

<think> To determine which side of the lung is abnormal in the provided chest X-ray, let's analyze the image step by step: 1. **Orientation:** The image is labeled with "L" indicating the left side of the patient. The arrow pointing upwards indicates the orientation of the patient's head. 2. **Lung Fields:** The left lung field appears to have increased density or opacity compared to the right lung field. The right lung field appears relatively clear and normal in density. 3. **Mediastinum and Heart:** The mediastinum and heart appear to be shifted slightly toward the left side, which is a common finding in cases of right-sided lung abnormalities such as atelectasis, consolidation, or pleural effusion. 4. **Rib and Chest Wall:** The ribs and chest wall appear symmetrical, with no obvious fractures or deformities. 5. **Conclusion:** Based on the increased density in the left lung field and the shift of the mediastinum toward the left, the left lung appears to be the abnormal side. </think> <answer>A. left</answer>
