# Supplementary material
Source: ML conference proceedings conference paper supplement (https://openreview.net/forum?id=AN4huNjF3r)
Supplement: supplementary_material [file 32b-vqa-rad.pdf › MedVLThinker-qualitative-results/32b/32b-vqa-rad.pdf]

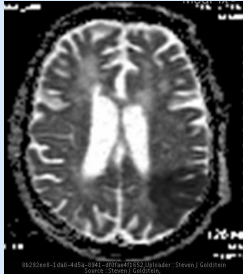

**Dataset:** VQA RAD

**Question:** Is the lesion wedge-shaped?

**Options:** A. Yes; B. No

---

<think> To determine if the lesion is wedge-shaped, let's analyze the image: 1. **Image Description:** The image appears to be an MRI scan of the brain, showing a cross-sectional view. The structure of the brain is visible, with the white matter and gray matter distinguishable. 2. **Lesion Identification:** The lesion in question is the area that appears darker or lighter compared to the surrounding tissue. In this image, there is a noticeable dark area in the center, which could be the lesion. 3. **Shape Analysis:** A wedge-shaped lesion typically has a triangular or fan-like appearance, extending from the surface of the brain inward. In this image, the dark area in the center appears to have a triangular shape, extending from the outer edge toward the center of the brain. 4. **Conclusion:** Based on the visual inspection, the lesion does appear to have a wedge-like shape, consistent with the description of a wedge-shaped lesion. </think> <answer>A. Yes</answer>
