# Supplementary material
Source: ML conference proceedings conference paper supplement (https://openreview.net/forum?id=AN4huNjF3r)
Supplement: supplementary_material [file medvlthinker-result-7b.pdf › MedVLThinker-qualitative-results/medvlthinker-result-7b.pdf]

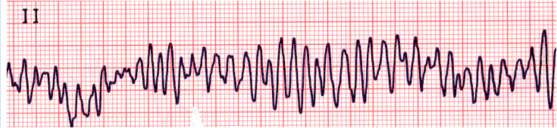

**Dataset:** 7B MMMU-Medical

**Question:** The following ECG was obtained from a dog. What is your rhythm diagnosis?

**Options:** A. Ventricular preexcitation syndrome; B. Ventricular fibrillation; C. Sustained ventricular tachycardia; D. Accelerated idioventricular rhythm

<think> The ECG in the image shows a pattern of irregular, chaotic, and rapid ventricular activity with no discernible P waves, which is characteristic of ventricular fibrillation. Ventricular fibrillation is a life-threatening arrhythmia where the ventricles contract in a disorganized manner, preventing the heart from pumping blood effectively. Let's analyze the options: - A. Ventricular preexcitation syndrome: This is characterized by a rapid ventricular response with a delta wave, which is not present in the image. - B. Ventricular fibrillation: The image shows irregular, chaotic waves, which is consistent with ventricular fibrillation. - C. Sustained ventricular tachycardia: This is characterized by a regular, rapid ventricular rhythm, which is not present in the image. - D. Accelerated idioventricular rhythm: This is characterized by a regular, slow ventricular rhythm, which is not present in the image. Given the irregular, chaotic pattern, the correct diagnosis is ventricular fibrillation. </think> <answer>B. Ventricular fibrillation</answer>

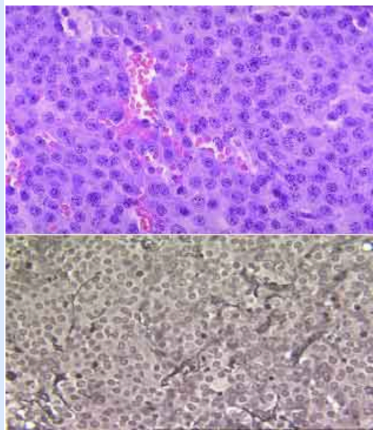

**Dataset:** 7B MMMU-Medical

**Question:** This lesion:

**Options:** A. can be seen in a patient with acromegaly; B. can be found incidentally; C. may require the use of a reticulin stain to differentiate from normal gland; D. can present as a non-functioning tumor with mass effect; E. all are correct

<think> The image appears to be a histological section of a pituitary gland, showing a lesion with a dense cellular infiltrate and a possible vascular component. This type of lesion is characteristic of a pituitary adenoma, which is a common finding in patients with acromegaly. Acromegaly is caused by the overproduction of growth hormone (GH) by a pituitary adenoma. The presence of a non-functioning tumor with mass effect is also a possibility, as adenomas can be non-functioning and still cause symptoms due to their size and location. The lesion could also be found incidentally during imaging or surgery for unrelated reasons. Differentiating between a pituitary adenoma and a normal pituitary gland can sometimes require the use of a reticulin stain, which helps to identify the fibrous tissue that is often present in adenomas. Given the options, the most comprehensive answer would be: E. all are correct </think> <answer>E. all are correct</answer>

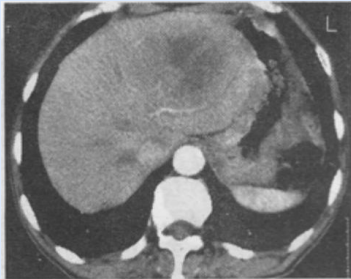

**Dataset:** 7B MMMU-Medical

**Question:** The 64-year-old man is with a 20-year history of liver cirrhosis. The post-enhancement arterial phase is shown in. The most likely diagnosis is?

**Options:** A. aortic dissection; B. liver cancer; C. liver abscess; D. Liver adenoma

<think> The image provided is a CT scan of the abdomen, showing a mass in the liver. The question specifies that the patient has a 20-year history of liver cirrhosis, which is a condition that can predispose to the development of liver tumors. The post-enhancement arterial phase of the CT scan shows a mass in the liver, which is a common finding in liver cancer. Liver cancer, also known as hepatocellular carcinoma, is more likely to be seen in patients with liver cirrhosis due to the underlying liver damage. Let's analyze the options: A. Aortic dissection - This is less likely because aortic dissection typically presents with symptoms of chest pain and is not usually associated with liver findings in a CT scan. B. Liver cancer - This is a strong possibility given the history of liver cirrhosis and the appearance of a mass in the liver on the CT scan. C. Liver abscess - While liver abscesses can occur, they are typically not associated with the specific appearance of a mass in the liver on a CT scan, especially in the context of liver cirrhosis. D. Liver adenoma - This is less likely because liver adenomas are usually not associated with the specific appearance of a mass in the liver on a CT scan, especially in the context of liver cirrhosis. Given the context and the appearance of the mass, the most likely diagnosis is liver cancer. </think> <answer>B. liver cancer</answer>

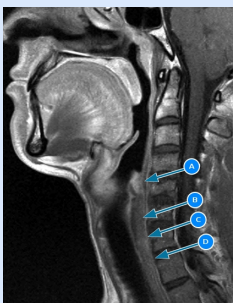

**Dataset:** 7B MedXpertQA-MM

**Question:** Using the provided image, please annotate the area labeled D.

**Options:** A. Lower border of cricoid cartilage; B. Arytenoid cartilage; C. Cricoid lamina; D. Vertebral body of C6; E. Level C7-D1

<think> To annotate the area labeled D, we need to identify the structure it points to in the image. The image appears to be a sagittal MRI of the larynx and cervical spine. The area labeled D is pointing to a structure that is located at the lower part of the cervical spine, specifically at the level of C7-D1. Let's analyze the options: A. Lower border of cricoid cartilage - This is not the correct structure as the cricoid cartilage is located in the lower part of the larynx, not the cervical spine. B. Arytenoid cartilage - This is a part of the larynx, not the cervical spine. C. Cricoid lamina - This is a part of the cricoid cartilage, not the cervical spine. D. Vertebral body of C6 - This is not the correct structure as the image shows a lower level of the cervical spine. E. Level C7-D1 - This is the correct structure as the image shows the lower part of the cervical spine, specifically at the level of C7-D1. Therefore, the correct answer is E. </think> <answer>E. Level C7-D1</answer>

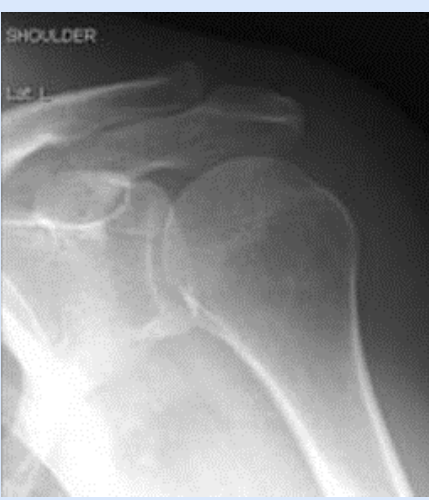

**Dataset:** 7B MedXpertQA-MM

**Question:** A 25-year old female with a seizure disorder complains of persistent left shoulder pain after sustaining a seizure 1 week ago. She was placed in a sling in the ER and is following up in your office. Figure A shows the radiograph taken in the ER. On examination, her range of motion is limited and is only able to externally rotate to neutral. What is the next step in management?

**Options:** A. Intra-articular cortisone injection with range of motion exercises; B. Axillary lateral radiograph; C. Sling use for comfort and follow-up in 2 weeks; D. Repeat True AP radiograph; E. MRI of the shoulder

<think> The radiograph in Figure A shows a shoulder joint with a clear view of the humeral head and glenoid fossa. The patient's history of a seizure and subsequent shoulder pain, along with limited range of motion, particularly in external rotation, suggests a possible shoulder dislocation or subluxation. The limited external rotation to neutral is a key finding that may indicate a shoulder dislocation or a more complex shoulder injury. Given the options: A. Intra-articular cortisone injection with range of motion exercises - This is a common treatment for shoulder pain but does not address the potential dislocation. B. Axillary lateral radiograph - This is a specific view that can help confirm a shoulder dislocation, which is a reasonable next step. C. Sling use for comfort and follow-up in 2 weeks - This is not a definitive management strategy for a potential dislocation. D. Repeat True AP radiograph - This is not typically the next step after an initial radiograph, as the initial view should be sufficient to assess the joint. E. MRI of the shoulder - While an MRI can provide detailed information, it is not the first-line step in the management of a potential shoulder dislocation. The most appropriate next step is to obtain an axillary lateral radiograph to confirm the diagnosis of a shoulder dislocation. </think> <answer>B. Axillary lateral radiograph</answer>

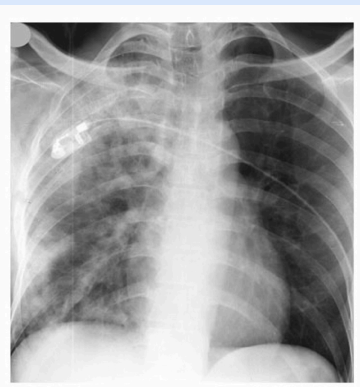

**Dataset:** 7B MedXpertQA-MM

**Question:** Given the findings on this chest X-ray, which condition most likely explains the radiographic abnormality?

**Options:** A. Reexpansion pulmonary edema; B. Hemothorax; C. Pneumocystis jiroveci pneumonia; D. Aspiration pneumonia; E. Acute respiratory distress syndrome

<think> To determine the most likely condition based on the chest X-ray findings, let's analyze the image step by step: 1. **Radiographic Abnormality:** The image shows a dense, homogenous opacity in the right lung field, which is a significant finding. This opacity is not consistent with the typical appearance of a pneumothorax (which would show a clear space with a line at the lung edge) or a hemothorax (which would show a fluid level). The opacity is also not consistent with the patchy distribution seen in pneumonia. 2. **Location:** The opacity is located in the right lung, which is a key point for diagnosis. 3. **Other Observations:** There is no evidence of a mass, which would be more suggestive of a neoplasm. There is no evidence of pleural effusion, which would be more suggestive of hemothorax or other conditions. Given these observations, the most likely condition is one that causes a homogenous opacity in the lung, such as reexpansion pulmonary edema, which can occur after a lung has been collapsed and then re-inflated. This condition is characterized by a dense, homogenous opacity in the lung field, which matches the findings in the image. Now, let's consider the options: A. Reexpansion pulmonary edema - This is a plausible explanation for the homogenous opacity in the lung field. B. Hemothorax - This would show a fluid level, which is not present. C. Pneumocystis jiroveci pneumonia - This typically presents with a more patchy distribution, not a homogenous opacity. D. Aspiration pneumonia - This usually presents with a lobar or segmental distribution, not a homogenous opacity. E. Acute respiratory distress syndrome (ARDS) - While ARDS can cause diffuse lung opacities, it is more typically associated with bilateral involvement, not a homogenous opacity in one lung. Based on the analysis, the most likely condition is reexpansion pulmonary edema. </think> <answer>A. Reexpansion pulmonary edema</answer>

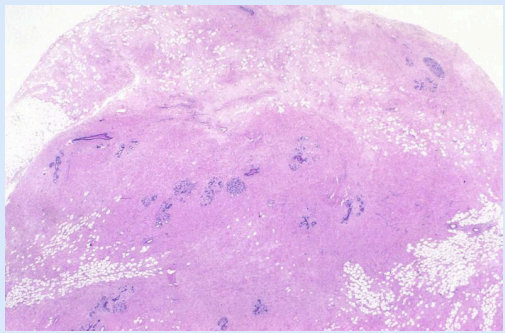

**Dataset:** 7B PathVQA

**Question:** Does this image show breast, fibroadenoma?

**Options:** A. Yes; B. No

<think> The image provided appears to be a histological section, likely stained with hematoxylin and eosin (H&E), which is commonly used in pathology to visualize tissue structures. The image shows a tissue sample with a mix of cellular and fibrous tissue, which is characteristic of a fibroadenoma. Fibroadenomas are benign tumors of the breast that are composed of both glandular and fibrous tissue. The presence of a well-defined, encapsulated mass with a mix of epithelial and stromal components is typical of a fibroadenoma. Given the options and the characteristics observed in the image, the answer is: A. Yes </think> <answer>A. Yes</answer>

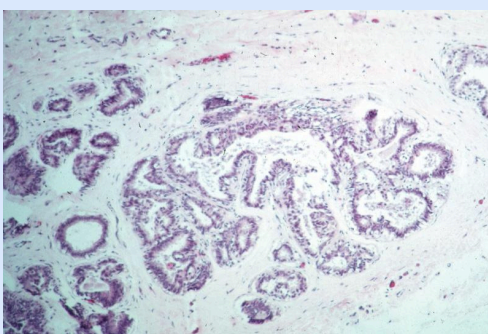

**Dataset:** 7B PathVQA

**Question:** Is intraductal papillomatosis with apocrine metaplasia present?

**Options:** A. Yes; B. No

<think> To determine if intraductal papillomatosis with apocrine metaplasia is present in the image, we need to analyze the histological features. Intraductal papillomatosis is characterized by the presence of papillary structures within the ducts, often with a fibrovascular core. Apocrine metaplasia refers to a type of epithelial cell change that can be seen in various benign and malignant conditions. In the provided image, we can observe structures that resemble papillary formations within ducts, which is a key feature of intraductal papillomatosis. Additionally, the presence of cells with a clear cytoplasm and a distinct nucleus, which can be indicative of apocrine metaplasia, is also noted. Given these observations, the image appears to show features consistent with intraductal papillomatosis with apocrine metaplasia. </think> <answer>A. Yes</answer>

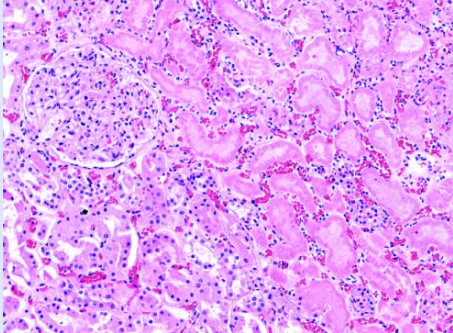

**Dataset:** 7B PathVQA

**Question:** Are the preserved outlines with loss of nuclei?

**Options:** A. Yes; B. No

<think> The image appears to be a histological section, likely stained with hematoxylin and eosin (H&E), which is commonly used to visualize the structure of tissues. In this type of staining, nuclei are typically stained blue, and the cytoplasm is stained pink. The image shows a pattern where the outlines of the cells are preserved, but the nuclei are not visible, suggesting they may be obscured or lost. Given the options: A. Yes - The outlines are preserved, and the nuclei are not visible. B. No - The outlines are not preserved. The correct answer is: </think> <answer>A. Yes</answer>

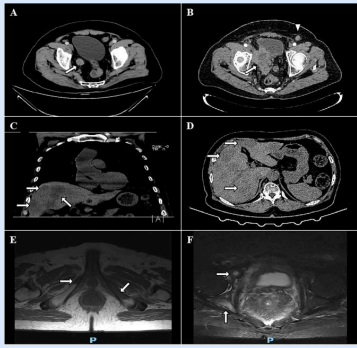

**Dataset:** 7B PMC VQA

**Question:** What does the left inguinal region show on the imaging tests?

**Options:** A. Local relapse in the tumor bed; B. Bilateral pubic bone metastases; C. Right acetabulum metastases; D. Lymphadenopathy

<think> To determine what the left inguinal region shows on the imaging tests, we need to analyze the images provided. The images are CT and MRI scans, which are commonly used to assess the inguinal region for abnormalities such as tumors, metastases, or lymphadenopathy. - Image A shows a cross-sectional view of the inguinal region with a focus on the left side, where there appears to be a mass (indicated by the arrow), which could be a tumor or a lymph node. - Image B shows a similar view but with a different contrast, possibly to better visualize the mass. - Image C is a coronal view of the pelvis, showing the left inguinal region with multiple arrows pointing to areas of interest, which could be lymph nodes or masses. - Image D is another cross-sectional view of the pelvis, showing the left inguinal region with arrows pointing to areas of interest, which could be lymph nodes or masses. - Image E is a T2-weighted MRI image of the pelvis, showing the left inguinal region with arrows pointing to areas of interest, which could be lymph nodes or masses. - Image F is a T1-weighted MRI image of the pelvis, showing the left inguinal region with arrows pointing to areas of interest, which could be lymph nodes or masses. Given the presence of arrows pointing to the left inguinal region in multiple images, it is reasonable to conclude that the imaging tests show lymphadenopathy in the left inguinal region. Therefore, the correct answer is: </think> <answer>D. Lymphadenopathy</answer>

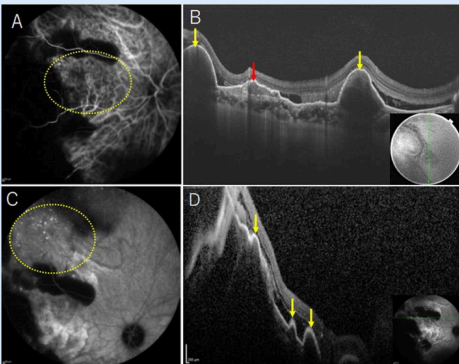

**Dataset:** 7B PMC VQA

**Question:** What does ICGA reveal in the nasal peripheral fundus in figure c?

**Options:** A. Sharp-peaked PED; B. Abnormal choroidal network; C. Punctate hyperfluorescent spot; D. Polypoidal lesion

<think> To determine what ICGA reveals in the nasal peripheral fundus in figure c, let's analyze the image step by step: 1. **Figure C** shows a fundus image with a yellow dotted circle highlighting a specific area. 2. The ICGA (Indocyanine Green Angiography) image in figure c shows a pattern of hyperfluorescence within the highlighted area. 3. The pattern of hyperfluorescence in ICGA typically indicates areas of abnormal choroidal vascularity or leakage. Given the options: - **A. Sharp-peaked PED:** PED stands for Pigment Epithelial Detachment, which is not typically what ICGA would show. - **B. Abnormal choroidal network:** This could be a possibility, but the image does not show a network pattern. - **C. Punctate hyperfluorescent spot:** This is a specific pattern that could be seen in ICGA, but it is not the most prominent feature in the image. - **D. Polypoidal lesion:** This is a specific type of lesion that can be seen in ICGA, and it matches the pattern of hyperfluorescence in the image. The most fitting option is **D. Polypoidal lesion**, as the image shows a pattern consistent with a polypoidal lesion, which is a common finding in certain retinal diseases. </think> <answer>D. Polypoidal lesion</answer>

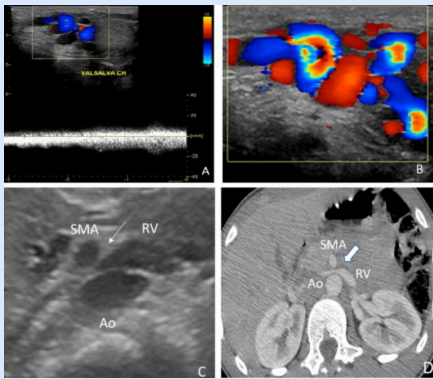

**Dataset:** 7B PMC VQA

**Question:** What is the location of the compression shown in the CT scan?

**Options:** A. Between the renal artery and the SMA; B. Between the AO and the pampiniform plexus; C. Between the left renal vein and the SMA; D. Between the left renal vein and the pampiniform plexus.

<think> To determine the location of the compression shown in the CT scan, let's analyze the images step by step: 1. **Image A and B:** These are Doppler ultrasound images showing the Valsalva channel with color flow mapping. The blue and red colors indicate blood flow, and the yellow box highlights the area of interest. 2. **Image C:** This is a grayscale ultrasound image showing the SMA (Superior Mesenteric Artery) and RV (Renal Vein). The SMA is clearly visible, and the RV is also marked. 3. **Image D:** This is a CT scan showing the same area. The SMA and RV are labeled, and the Ao (Aorta) is also visible. The blue arrow in the CT scan points to the area of interest. By comparing the ultrasound images with the CT scan, we can see that the blue arrow in the CT scan points to the area where the SMA and RV are located. The SMA is on the left side of the RV in the CT scan, indicating that the compression is likely between the SMA and the RV. Given the options: A. Between the renal artery and the SMA. B. Between the AO and the pampiniform plexus. C. Between the left renal vein and the SMA. D. Between the left renal vein and the pampiniform plexus. The correct location of the compression, based on the CT scan, is between the SMA and the RV. </think> <answer>C. Between the left renal vein and the SMA</answer>

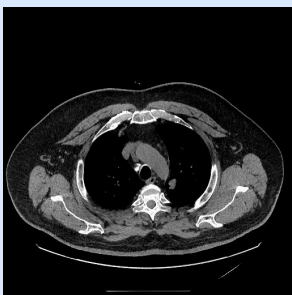

**Dataset:** 7B SLAKE

**Question:** Does the picture contain lung?

**Options:** A. Yes; B. No

<think> The image appears to be a cross-sectional view of the thoracic region, which includes the lungs. The dark circular structure in the center is indicative of the lung, surrounded by the ribs and other structures. The presence of the lung is confirmed by the typical appearance of the lung tissue and the surrounding air-filled space. </think> <answer>A. Yes</answer>

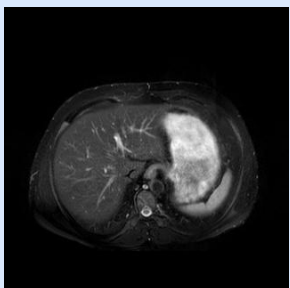

**Dataset:** 7B SLAKE

**Question:** Does the liver look normal?

**Options:** A. Yes; B. No

<think> The image appears to be a medical scan, likely an MRI or CT scan, of the liver. The liver is the large organ on the left side of the image, and it appears to have a normal size and shape. There are no visible signs of abnormality such as tumors, cysts, or significant changes in texture or density that would suggest a pathological condition. The right side of the image shows a mass, which is not the liver and is likely the gallbladder or another organ, but this does not affect the assessment of the liver itself. Given the options and the appearance of the liver in the image, the liver looks normal. </think> <answer>A. Yes</answer>

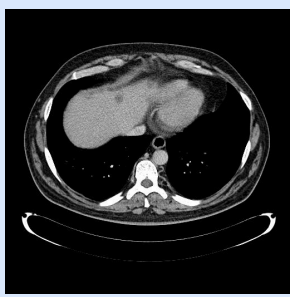

**Dataset:** 7B SLAKE

**Question:** Which is bigger in this image, liver or heart?

**Options:** A. liver; B. heart

<think> To determine which is bigger in the image, we need to compare the size of the liver and the heart. The liver is typically larger than the heart in a cross-sectional view of the abdomen and thorax. In this image, the liver appears to occupy a larger area than the heart, which is located more centrally and is smaller in comparison. </think> <answer>A. liver</answer>

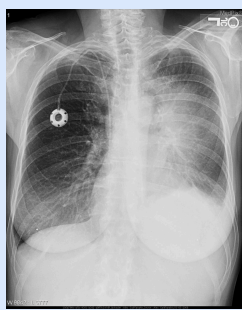

**Dataset:** 7B VQA RAD

**Question:** Is there evidence of pulmonary edema?

**Options:** A. Yes; B. No

<think> To determine if there is evidence of pulmonary edema in the provided chest X-ray, we need to look for several characteristic findings: 1. **Increased lung markings:** This can be seen as a hazy or frosted glass appearance in the lung fields. 2. **Blunting of costophrenic angles:** This is where the lung meets the diaphragm and appears as a blurring of the angle. 3. **Interstitial markings:** These are fine, linear markings that can be seen in the lung fields. 4. **Cardiomegaly:** An enlarged heart can be a sign of heart failure, which can lead to pulmonary edema. 5. **Hydropneumothorax:** This is not present in the image. In the provided image, there is no significant blurring of the costophrenic angles, no increased lung markings, and no evidence of interstitial markings. The heart size appears to be within normal limits. Therefore, there is no clear evidence of pulmonary edema in this image. </think> <answer>B. No</answer>

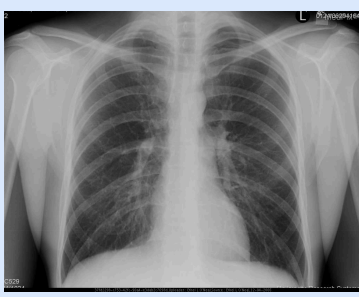

**Dataset:** 7B VQA RAD

**Question:** Is there a left apical pneumothorax?

**Options:** A. Yes; B. No

<think> To determine if there is a left apical pneumothorax, we need to analyze the chest X-ray for signs of air outside the lung tissue in the upper left part of the chest (apical region). In a pneumothorax, the lung tissue collapses, and the area where the lung should be appears as a dark space on the X-ray. In the provided image, the left side of the chest appears to have a darker area in the upper region, which is consistent with the appearance of a pneumothorax. The dark area is located in the apical region of the left lung, which is the area closest to the top of the chest. Therefore, based on the visual inspection of the X-ray, it appears that there is a left apical pneumothorax. </think> <answer>A. Yes</answer>

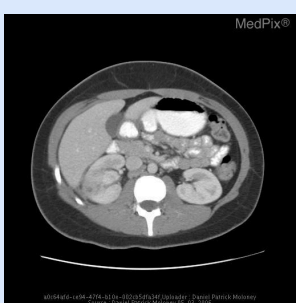

**Dataset:** 7B VQA RAD

**Question:** Is the liver normal?

**Options:** A. Yes; B. No

<think> To determine if the liver is normal in the provided CT scan, we need to assess the size, shape, and any visible abnormalities such as masses, cysts, or areas of increased or decreased density. In the image: - The liver appears to be of a normal size and shape. - There are no obvious masses or areas of abnormal density that would suggest a pathological process. - The liver's interface with the surrounding structures (such as the gallbladder and the diaphragm) appears smooth and without any signs of displacement or distortion. Given these observations, the liver appears to be within normal limits. </think> <answer>A. Yes</answer>
